# Supplementary material
Source: MDPI journal article supplement (https://www.mdpi.com/2073-4441/13/22/3226)
Supplement: s1 [file s1 › water-1430486-supplementary.pdf]

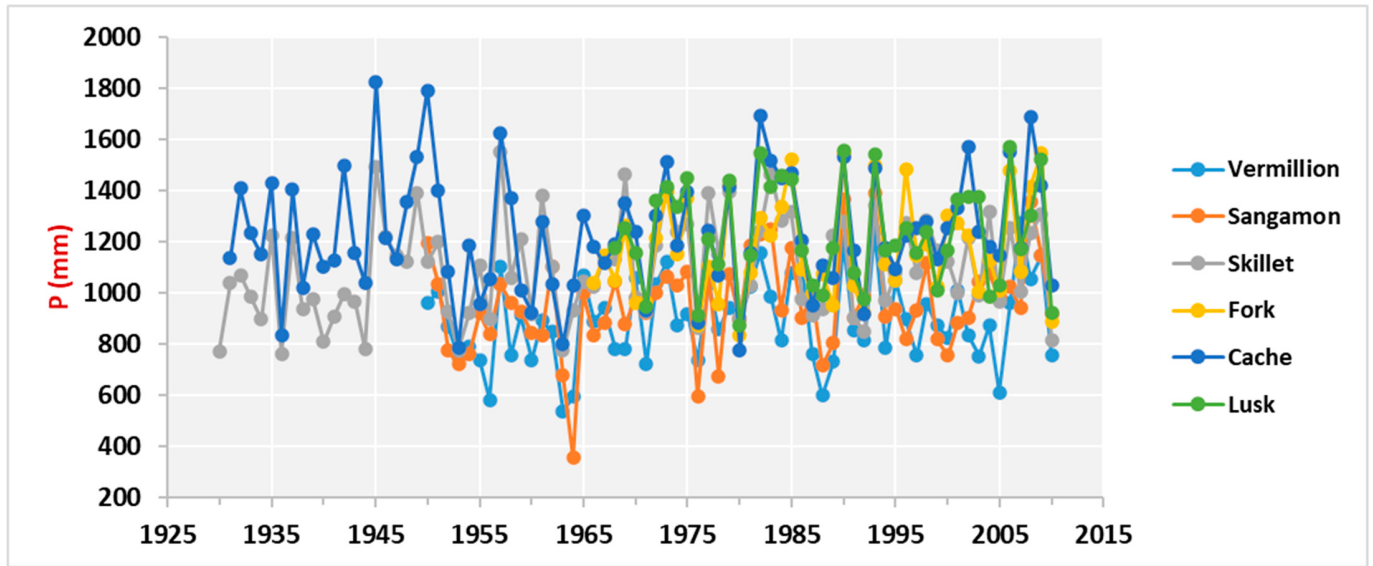

(a)

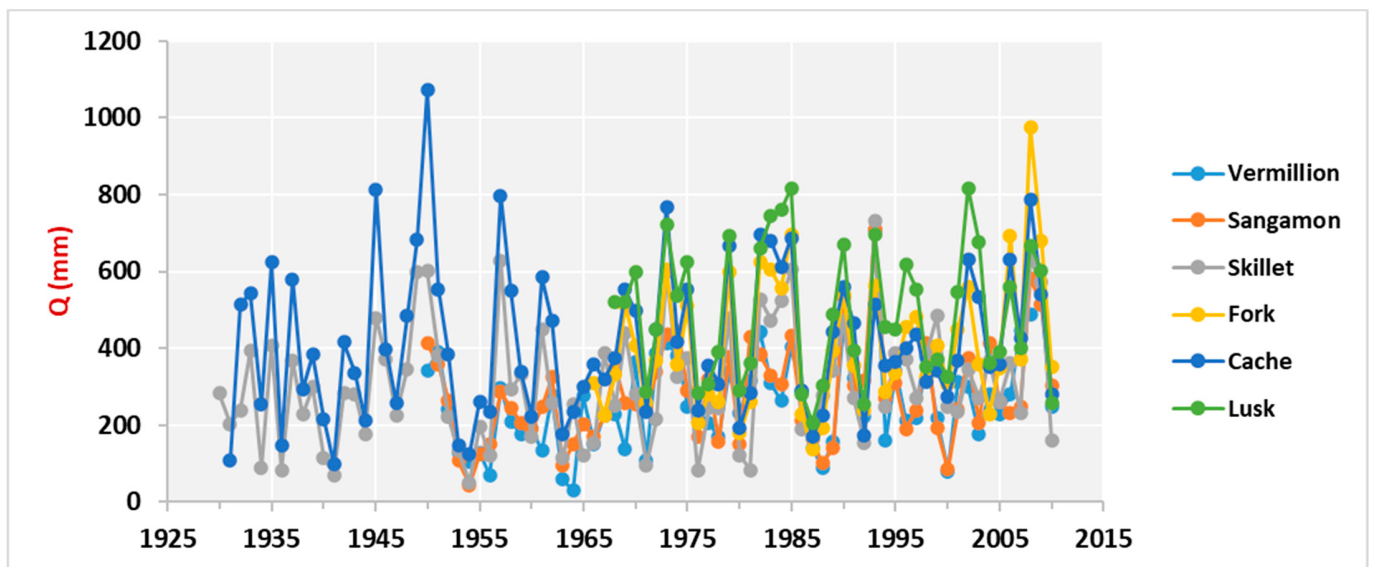

(b)

**Figure S1:** Annual time series of (a) precipitation and (b) streamflow for Vermillion, Sangamon, Skillet, Fork, Cache, and Lusk watersheds.
